# Supplementary material
Source: Springer Nature journal article supplement (https://www.springermedizin.de/resource/supplementary/12885_2012_3556_MOESM1_ESM.pdf/9463858)
Supplement: MOESM1 [file 9463858]

Newly diagnosed stage I-IIIc breast cancer survivors in Calgary, Edmonton, and surrounding Alberta communities

Presurgical fasting blood draw if possible

Surgery

Tumor specimen

Postsurgical fasting blood draw prior to any adjuvant therapy

Baseline assessment  $\leq 60$  days of surgery or  $< 2$  cycles of neoadjuvant chemotherapy

Investigator-assessed variables requiring a clinic visit (i.e., health-related fitness, physical functioning, objective physical activity, blood draw)

Patient-reported variables not requiring a clinic visit (i.e., patient-reported outcomes, health behaviors, and

1 year assessment

Investigator-assessed variables requiring a clinic visit

Vital status check including medical chart review for treatment and disease outcomes

Patient-reported variables not requiring a clinic visit

3 year assessment

Investigator-assessed variables requiring a clinic visit

Vital status check

Patient-reported variables not requiring a clinic visit

5 year assessment

Vital status check

Patient-reported variables not requiring a clinic visit

Annual follow-up of vital status
